# Supplementary material for: Machine Learning Models for Predicting Adverse Pregnancy Outcomes in Pregnant Women with Systemic Lupus Erythematosus
Source: MDPI journal article supplement (doi:10.3390/diagnostics13040612), 2023-02-07
Supplement: s1 [file s1]

**Table S1.** Statistical description and missing data rate of 288 variables.

| Variables                             |                     |     | Adverse pregnancy<br>outcomes<br>(n=22) | Positive pregnancy<br>outcomes<br>(n=29) | Missing<br>data rate<br>(%) |
|---------------------------------------|---------------------|-----|-----------------------------------------|------------------------------------------|-----------------------------|
| <b>Clinical Domain (66 variables)</b> |                     |     |                                         |                                          |                             |
| Age (years)                           |                     |     | 30.5 (28.8-33.3)                        | 31.0 (29.0-32.5)                         | 0.00                        |
| Gravidity                             |                     |     | 2 (1-2)                                 | 2 (1-2)                                  | 0.00                        |
| Parity                                |                     |     | 0 (0-0)                                 | 0 (0-1)                                  | 0.00                        |
| Disease duration (years)              |                     |     | 8.5 (3-10.3)                            | 8 (4-13.5)                               | 0.00                        |
| History of adverse outcomes           | Yes                 |     | 5 (22.7)                                | 5 (17.2)                                 | 1.96                        |
| Gestational age at Delivery           |                     |     | 36.9 (34.1-37.9)                        | 39.0 (38.1-39.3)                         | 0.00                        |
| Delivery mode, n (%)                  | Cesarean section    |     | 18 (81.8)                               | 19 (65.5)                                | 0.00                        |
|                                       | Vaginal delivery    |     | 4 (18.2)                                | 10 (34.5)                                |                             |
| Gender of neonates, n (%)             | Male                |     | 9 (40.9)                                | 18 (62.1)                                | 0.00                        |
|                                       | Female              |     | 13 (59.1)                               | 11 (37.9)                                |                             |
| Birth weight of neonates              |                     |     | 2475 (2065-2907)                        | 3130 (2975-3355)                         | 0.00                        |
| Hospitalization after delivery        | Yes                 |     | 4 (18.2)                                | 4 (13.8)                                 | 0.00                        |
| Doses of prednisone (mg/day)          | Pre-pregnancy       |     | 6.3 (5.0-10.0)                          | 7.5 (5.0-10.0)                           | 0.00                        |
|                                       | ≤ 13 weeks+6        |     | 7.5 (5.0-10.0)                          | 7.5 (5.0-10.0)                           | 0.00                        |
|                                       | 14 weeks-27 weeks+6 |     | 8.8 (5.0-10.0)                          | 7.5 (5.0-10.0)                           | 0.00                        |
|                                       | ≥ 28 weeks          |     | 7.5 (5.0-10.0)                          | 7.5 (5.0-10.0)                           | 1.96                        |
| Doses of hydroxychloroquine (g/day)   | Pre-pregnancy       |     | 0.4 (0.2-0.4)                           | 0.2 (0.1-0.4)                            | 0.00                        |
|                                       | ≤ 13 weeks+6        |     | 0.4 (0.2-0.4)                           | 0.2 (0.1-0.4)                            | 0.00                        |
|                                       | 14 weeks-27 weeks+6 |     | 0.4 (0.2-0.4)                           | 0.2 (0.2-0.4)                            | 0.00                        |
|                                       | ≥ 28 weeks          |     | 0.4 (0.2-0.4)                           | 0.2 (0.2-0.4)                            | 1.96                        |
| Immunosuppressant                     | Pre-pregnancy       | Yes | 2 (9.1)                                 | 0 (0)                                    | 0.00                        |
|                                       | ≤ 13 weeks+6        | Yes | 1 (4.5)                                 | 0 (0)                                    | 0.00                        |
|                                       | 14 weeks-27 weeks+6 | Yes | 3 (13.6)                                | 1 (3.4)                                  | 3.92                        |
|                                       | ≥ 28 weeks          | Yes | 2 (9.1)                                 | 2 (6.9)                                  | 1.96                        |
| Doses of aspirin (mg/day)             | Pre-pregnancy       |     | 0 (0.0-0.0)                             | 0 (0.0-0.0)                              | 0.00                        |
|                                       | ≤ 13 weeks+6        |     | 0 (0.0-0.0)                             | 0 (0.0-0.0)                              | 0.00                        |
|                                       | 14 weeks-27 weeks+6 |     | 0 (0.0-0.0)                             | 0 (0.0-25.0)                             | 0.00                        |
|                                       | ≥ 28 weeks          |     | 0 (0.0-0.0)                             | 0 (0.0-25.0)                             | 1.96                        |
| Low molecular weight heparin          | Pre-pregnancy       | Yes | 0 (0)                                   | 0 (0)                                    | 0.00                        |
|                                       | ≤ 13 weeks+6        | Yes | 1 (4.5)                                 | 2 (6.9)                                  | 0.00                        |
|                                       | 14 weeks-27 weeks+6 | Yes | 4 (18.2)                                | 5 (17.2)                                 | 0.00                        |
|                                       | ≥ 28 weeks          | Yes | 4 (18.2)                                | 5 (17.2)                                 | 1.96                        |
| Painful and swollen joints            | Pre-pregnancy       | Yes | 0 (0)                                   | 1 (3.4)                                  | 0.00                        |
|                                       | ≤ 13 weeks+6        | Yes | 1 (4.5)                                 | 0 (0)                                    | 0.00                        |

|                                   |                     |     |                 |               |              |
|-----------------------------------|---------------------|-----|-----------------|---------------|--------------|
|                                   | 14 weeks-27 weeks+6 | Yes | 1 (4.5)         | 0 (0)         | 0.00         |
|                                   | ≥ 28 weeks          | Yes | 1 (4.5)         | 0 (0)         | 1.96         |
| Rash                              | Pre-pregnancy       | Yes | 2 (9.1)         | 2 (6.9)       | 0.00         |
|                                   | ≤ 13 weeks+6        | Yes | 2 (9.1)         | 1 (3.4)       | 0.00         |
|                                   | 14 weeks-27 weeks+6 | Yes | 2 (9.1)         | 0 (0)         | 0.00         |
|                                   | ≥ 28 weeks          | Yes | 3 (13.6)        | 1 (3.4)       | 1.96         |
| Alopecia                          | Pre-pregnancy       | Yes | 1 (4.5)         | 2 (6.9)       | 0.00         |
|                                   | ≤ 13 weeks+6        | Yes | 1 (4.5)         | 3 (10.3)      | 0.00         |
|                                   | 14 weeks-27 weeks+6 | Yes | 1 (4.5)         | 1 (3.4)       | 0.00         |
|                                   | ≥ 28 weeks          | Yes | 1 (4.5)         | 1 (3.4)       | 1.96         |
| Muscle weakness or pain           | Pre-pregnancy       | Yes | 0 (0)           | 0 (0)         | 0.00         |
|                                   | ≤ 13 weeks+6        | Yes | 1 (4.5)         | 1 (3.4)       | 0.00         |
|                                   | 14 weeks-27 weeks+6 | Yes | 0 (0)           | 1 (3.4)       | 0.00         |
|                                   | ≥ 28 weeks          | Yes | 0 (0)           | 1 (3.4)       | 1.96         |
| Shortness of breath               | Pre-pregnancy       | Yes | 0 (0)           | 0 (0)         | 0.00         |
|                                   | ≤ 13 weeks+6        | Yes | 0 (0)           | 0 (0)         | 0.00         |
|                                   | 14 weeks-27 weeks+6 | Yes | 0 (0)           | 0 (0)         | 0.00         |
|                                   | ≥ 28 weeks          | Yes | 0 (0)           | 0 (0)         | 1.96         |
| Raynaud's phenomenon              | Pre-pregnancy       | Yes | 0 (0)           | 0 (0)         | 0.00         |
|                                   | ≤ 13 weeks+6        | Yes | 0 (0)           | 0 (0)         | 0.00         |
|                                   | 14 weeks-27 weeks+6 | Yes | 0 (0)           | 0 (0)         | 0.00         |
|                                   | ≥ 28 weeks          | Yes | 0 (0)           | 0 (0)         | 1.96         |
| Photosensitivity                  | Pre-pregnancy       | Yes | 0 (0)           | 3 (10.3)      | 0.00         |
|                                   | ≤ 13 weeks+6        | Yes | 0 (0)           | 2 (6.9)       | 0.00         |
|                                   | 14 weeks-27 weeks+6 | Yes | 0 (0)           | 2 (6.9)       | 0.00         |
|                                   | ≥ 28 weeks          | Yes | 0 (0)           | 1 (3.4)       | 1.96         |
| Mucosal ulcers                    | Pre-pregnancy       | Yes | 1 (4.5)         | 1 (3.4)       | 0.00         |
|                                   | ≤ 13 weeks+6        | Yes | 0 (0)           | 1 (3.4)       | 0.00         |
|                                   | 14 weeks-27 weeks+6 | Yes | 0 (0)           | 1 (3.4)       | 0.00         |
|                                   | ≥ 28 weeks          | Yes | 0 (0)           | 1 (3.4)       | 1.96         |
| Abdominal pain or diarrhea        | Pre-pregnancy       | Yes | 0 (0)           | 0 (0)         | 0.00         |
|                                   | ≤ 13 weeks+6        | Yes | 0 (0)           | 0 (0)         | 0.00         |
|                                   | 14 weeks-27 weeks+6 | Yes | 0 (0)           | 0 (0)         | 0.00         |
|                                   | ≥ 28 weeks          | Yes | 0 (0)           | 0 (0)         | 1.96         |
| Hematologic Domain (57 variables) |                     |     |                 |               |              |
| Leukocyte ( x 10(9)/L)            | Pre-pregnancy       |     | 6.0 (5.5-7.0)   | 6.8 (5.1-8.8) | <u>33.33</u> |
|                                   | ≤ 13 weeks+6        |     | 5.7 (5.0-8.8)   | 5.6 (5.2-7.9) | 19.61        |
|                                   | 14 weeks-27 weeks+6 |     | 6.7 (5. 3-10.6) | 7.5 (6.5-9.7) | 23.53        |

|                           |                     |                     |                     |              |
|---------------------------|---------------------|---------------------|---------------------|--------------|
|                           | 28 weeks-31 weeks+6 | 8.0 (6.6-11.3)      | 7.8 (6.8-9.9)       | 29.41        |
|                           | 32 weeks-35 weeks+6 | 7.6 (6.8-9.5)       | 7.7 (6.6-10.3)      | <u>37.25</u> |
|                           | ≥ 36 weeks          | 7.4 (6.5-9.6)       | 7.7 (6.9-10.1)      | <u>41.18</u> |
| Lymphocyte ( x 10(9)/L)   | Pre-pregnancy       | 1.8 (1.5-2.0)       | 1.8 (1.5-2.1)       | <u>31.37</u> |
|                           | ≤ 13 weeks+6        | 1.4 (1.1-2.2)       | 1.6 (1.4-1.8)       | 19.61        |
|                           | 14 weeks-27 weeks+6 | 1.4 (0.9-2.1)       | 1.5 (1.3-1.9)       | 23.53        |
|                           | 28 weeks-31 weeks+6 | 1.3 (1.1-2.0)       | 1.7 (1.3-1.9)       | 29.41        |
|                           | 32 weeks-35 weeks+6 | 1.3 (1.2-2.0)       | 1.6 (1.3-1.9)       | <u>37.25</u> |
|                           | ≥ 36 weeks          | 1.3 (0.8-1.7)       | 1.5 (1.2-1.8)       | <u>41.18</u> |
| Neutrophil ( x 10(9)/L)   | Pre-pregnancy       | 3.4 (2.9-4.6)       | 3.4 (3.3-4.4)       | <u>31.37</u> |
|                           | ≤ 13 weeks+6        | 4.6 (3.4-7.8)       | 5.2 (3.2-6.9)       | 19.61        |
|                           | 14 weeks-27 weeks+6 | 5.1 (4.0-8.4)       | 5.5 (4.6-7.7)       | 23.53        |
|                           | 28 weeks-31 weeks+6 | 6.2 (4.9-8.5)       | 5.7 (5.0-7.2)       | 29.41        |
|                           | 32 weeks-35 weeks+6 | 5.2 (5.0-7.6)       | 5.9 (4.7-8.0)       | <u>37.25</u> |
|                           | ≥ 36 weeks          | 6.2 (4.4-7.2)       | 5.5 (4.6-7.5)       | <u>41.18</u> |
| Platelet ( x 10(9)/L)     | Pre-pregnancy       | 218.0 (158.0-329.0) | 219.0 (185.0-252.0) | <u>31.37</u> |
|                           | ≤ 13 weeks+6        | 176.7 (124.0-234.5) | 220.0 (197.0-271.5) | 19.61        |
|                           | 14 weeks-27 weeks+6 | 168.0 (121.0-202.5) | 214.0 (172.0-236.5) | 23.53        |
|                           | 28 weeks-31 weeks+6 | 154.5 (107.0-192.0) | 205.0 (163.0-222.0) | 29.41        |
|                           | 32 weeks-35 weeks+6 | 158.0 (111.0-227.0) | 208.0 (169.0-235.5) | <u>37.25</u> |
|                           | ≥ 36 weeks          | 170.0 (116.0-216.0) | 198.0 (154.5-209.5) | <u>41.18</u> |
|                           | Before delivery     | 148.5 (108.3-219.5) | 186.0 (148.5-228.5) | 0.00         |
|                           | After delivery      | 189.5 (111.0-237.3) | 233.0 (206.0-261.0) | 19.61        |
| Erythrocyte ( x 10(12)/L) | Pre-pregnancy       | 4.3 (4.3-4.6)       | 4.3 (4.2-4.5)       | <u>31.37</u> |
|                           | ≤ 13 weeks+6        | 4.4 (4.0-4.8)       | 4.2 (3.9-4.6)       | 19.61        |
|                           | 14 weeks-27 weeks+6 | 4.2 (3.7-4.4)       | 4.0 (3.8-4.3)       | 23.53        |
|                           | 28 weeks-31 weeks+6 | 4.0 (3.8-4.3)       | 3.8 (3.7-4.2)       | 29.41        |
|                           | 32 weeks-35 weeks+6 | 3.8 (3.6-3.9)       | 4.0 (3.7-4.2)       | <u>37.25</u> |
|                           | ≥ 36 weeks          | 3.8 (3.5-4.2)       | 3.9 (3.8-4.1)       | <u>41.18</u> |
|                           | Before delivery     | 3.9 (3.6-4.3)       | 3.9 (3.7-4.2)       | 0.00         |
|                           | After delivery      | 4.7 (4.4-4.9)       | 4.5 (4.3-4.7)       | 19.61        |
| Hematocrit (%)            | Pre-pregnancy       | 38.6 (35.4-41.7)    | 38.9 (37.8-39.6)    | <u>31.37</u> |
|                           | ≤ 13 weeks+6        | 38.3 (35.6-41.1)    | 37.3 (35.7-39.0)    | 19.61        |
|                           | 14 weeks-27 weeks+6 | 37.3 (31.8-39.5)    | 36.0 (34.4-37.7)    | 23.53        |
|                           | 28 weeks-31 weeks+6 | 36.5 (33.0-37.7)    | 35.9 (33.6-38.1)    | 29.41        |
|                           | 32 weeks-35 weeks+6 | 35.1 (32.3-35.6)    | 34.8 (34.2-36.3)    | <u>37.25</u> |
|                           | ≥ 36 weeks          | 34.7 (31.6-39.0)    | 35.8 (34.5-37.4)    | <u>41.18</u> |
|                           | Before delivery     | 35.3 (31.5-40.3)    | 36.7 (35.3-38.9)    | 0.00         |
|                           | After delivery      | 41.9 (39.1-43.9)    | 40.2 (38.6-41.7)    | 19.61        |
| Hemoglobin (g/L)          | Pre-pregnancy       | 129.5 (116.3-139.0) | 132.0 (127.0-134.5) | <u>31.37</u> |
|                           | ≤ 13 weeks+6        | 127.0 (119.0-137.5) | 127.0 (123.0-133.5) | 19.61        |
|                           | 14 weeks-27 weeks+6 | 126.5 (106.3-135.0) | 122.0 (117.0-128.0) | 23.53        |

|                                    |                     |          |                     |                     |              |
|------------------------------------|---------------------|----------|---------------------|---------------------|--------------|
|                                    | 28 weeks-31 weeks+6 |          | 124.5 (110.0-128.5) | 119.0 (112.5-126.0) | 29.41        |
|                                    | 32 weeks-35 weeks+6 |          | 117.0 (108.5-122.5) | 117.2 (115.0-122.5) | <u>37.25</u> |
|                                    | ≥ 36 weeks          |          | 115.0 (106.0-133.0) | 120.0 (113.0-123.0) | <u>41.18</u> |
|                                    | Before delivery     |          | 117.0 (98.8-134.5)  | 125.0 (114.5-129.0) | 0.00         |
|                                    | After delivery      |          | 136.0 (126.3-143.5) | 132.0 (124.5-136.5) | 19.61        |
| PT (s)                             | Before delivery     |          | 12.1 (11.7-12.4)    | 11.8 (11.7-12.5)    | 1.96         |
| PT-act (%)                         | Before delivery     |          | 119.5 (107.0-130.3) | 125.0 (111.0-136.0) | 1.96         |
| PT-R                               | Before delivery     |          | 0.9 (0.9-1.0)       | 0.9 (0.9-1.0)       | 1.96         |
| INR                                | Before delivery     |          | 0.9 (0.9-1.0)       | 0.9 (0.9-1.0)       | 1.96         |
| Fbg (g/L)                          | Before delivery     |          | 4.3 (4.0-4.8)       | 4.3 (3.8-4.8)       | 1.96         |
| APTT (s)                           | Before delivery     |          | 34.6 (31.5-39.7)    | 32.3 (30.2-33.9)    | 1.96         |
| TT (s)                             | Before delivery     |          | 16.4 (15.8-16.9)    | 15.4 (15.2-16.1)    | 1.96         |
| <b>Renal Domain (56 variables)</b> |                     |          |                     |                     |              |
| Urine protein (g/L), n (%)         | Pre-pregnancy       | negative | 5 (22.7)            | 12 (41.4)           | <u>41.18</u> |
|                                    |                     | (+-)     | 3 (13.6)            | 6 (20.7)            |              |
|                                    |                     | (+)      | 14 (63.6)           | 9 (31.0)            |              |
|                                    |                     | (++)     | 0 (0)               | 2 (6.9)             |              |
|                                    | ≤ 13 weeks+6        | negative | 9 (40.9)            | 10 (34.5)           | 19.61        |
|                                    |                     | (+-)     | 1 (4.5)             | 1 (3.4)             |              |
|                                    |                     | (+)      | 11 (50.0)           | 13 (44.8)           |              |
|                                    |                     | (++)     | 1 (4.5)             | 5 (17.2)            |              |
|                                    | 14 weeks-27 weeks+6 | negative | 9 (40.9)            | 12 (41.4)           | 15.69        |
|                                    |                     | (+-)     | 3 (13.6)            | 5 (17.2)            |              |
|                                    |                     | (+)      | 9 (40.9)            | 11 (37.9)           |              |
|                                    |                     | (++)     | 1 (4.5)             | 1 (3.4)             |              |
|                                    | ≥ 28 weeks          | negative | 13 (59.1)           | 14 (48.3)           | <u>31.37</u> |
|                                    |                     | (+-)     | 9 (40.9)            | 11 (37.9)           |              |
|                                    |                     | (+)      | 0 (0)               | 4 (13.8)            |              |
|                                    |                     | (++)     | 0 (0)               | 0 (0)               |              |
| Urine erythrocyte counting (/HP)   | Pre-pregnancy       |          | 0.0 (0.0-1.0)       | 0.0 (0.0-0.0)       | <u>41.18</u> |
|                                    | ≤ 13 weeks+6        |          | 0.0 (0.0-1.0)       | 0.0 (0.0-0.0)       | 19.61        |
|                                    | 14 weeks-27 weeks+6 |          | 0.0 (0.0-0.0)       | 0.0 (0.0-0.0)       | 15.69        |
|                                    | ≥ 28 weeks          |          | 0.0 (0.0-0.2)       | 0.0 (0.0-0.0)       | <u>31.37</u> |
| Urinary casts (/μL)                | Pre-pregnancy       |          | 0.0 (0.0-0.2)       | 0.0 (0.0-0.3)       | 29.41        |
|                                    | ≤ 13 weeks+6        |          | 0.0 (0.0-0.2)       | 0.2 (0.0-0.3)       | <u>35.29</u> |
|                                    | 14 weeks-27 weeks+6 |          | 0.0 (0.0-0.0)       | 0.1 (0.0-0.3)       | 19.61        |
|                                    | ≥ 28 weeks          |          | 0.0 (0.0-0.7)       | 0.0 (0.0-0.5)       | 3.92         |
| Urine hyaline casts (/μL)          | Pre-pregnancy       |          | 0.0 (0.0-0.4)       | 0.1 (0.0-0.6)       | 29.41        |
|                                    | ≤ 13 weeks+6        |          | 0.3 (0.0-0.5)       | 0.3 (0.0-0.6)       | <u>35.29</u> |
|                                    | 14 weeks-27 weeks+6 |          | 0.0 (0.0-0.3)       | 0.3 (0.0-0.5)       | 19.61        |
|                                    | ≥ 28 weeks          |          | 0.0 (0.0-0.6)       | 0.0 (0.0-0.6)       | 3.92         |

|                                       |                     |                     |                     |              |
|---------------------------------------|---------------------|---------------------|---------------------|--------------|
| Urine squamous epithelial cells (/μL) | Pre-pregnancy       | 1.4 (0.0-25.6)      | 5.7 (3.6-22.4)      | 29.41        |
|                                       | ≤ 13 weeks+6        | 5.2 (0.0-26.8)      | 6.6 (0.8-16.7)      | <u>35.29</u> |
|                                       | 14 weeks-27 weeks+6 | 2.8 (0.0-8.8)       | 12.9 (0.0-19.7)     | 19.61        |
|                                       | ≥ 28 weeks          | 2.3 (0.0-13.8)      | 4.0 (0.7-7.9)       | 3.92         |
| Urine bacteria (/μL)                  | Pre-pregnancy       | 7.3 (0.0-359.9)     | 107.0 (27.3-672.9)  | 29.41        |
|                                       | ≤ 13 weeks+6        | 27.5 (0.0-378.9)    | 113.1 (66.9-1248.9) | <u>35.29</u> |
|                                       | 14 weeks-27 weeks+6 | 30.4 (0.0-371.0)    | 110.3 (0.0-221.0)   | 19.61        |
|                                       | ≥ 28 weeks          | 104.3 (0.0-259.9)   | 64.0 (34.0-211.1)   | 3.92         |
| Urine yeast (/μL)                     | Pre-pregnancy       | 0.0 (0.0-0.0)       | 0.0 (0.0-0.0)       | 29.41        |
|                                       | ≤ 13 weeks+6        | 0.0 (0.0-0.0)       | 0.0 (0.0-0.0)       | <u>35.29</u> |
|                                       | 14 weeks-27 weeks+6 | 0.0 (0.0-0.0)       | 0.0 (0.0-0.0)       | 19.61        |
|                                       | ≥ 28 weeks          | 0.0 (0.0-0.0)       | 0.0 (0.0-0.0)       | 3.92         |
| Urine crystals (/μL)                  | Pre-pregnancy       | 0.0 (0.0-0.5)       | 0.1 (0.1-0.7)       | 29.41        |
|                                       | ≤ 13 weeks+6        | 0 (0-0.6)           | 0.4 (0.0-1.3)       | <u>35.29</u> |
|                                       | 14 weeks-27 weeks+6 | 0 (0-0.1)           | 0.1 (0-0.2)         | 19.61        |
|                                       | ≥ 28 weeks          | 0 (0-0.7)           | 0 (0-0.5)           | 3.92         |
| Creatinine (μmol/L)                   | Pre-pregnancy       | 61.0 (56.3-61.8)    | 54.0 (46.9-61.2)    | <u>45.10</u> |
|                                       | ≤ 13 weeks+6        | 49.3 (47.0-59.6)    | 51.0 (41.0-57.8)    | <u>33.33</u> |
|                                       | 14 weeks-27 weeks+6 | 49.7 (48.5-53.5)    | 42.2 (37.8-52.7)    | <u>35.29</u> |
|                                       | ≥ 28 weeks          | 50.2 (37.0-52.3)    | 43.4 (39.9-48.9)    | <u>45.10</u> |
|                                       | Before delivery     | 50.6 (43.6-62.5)    | 48.4 (43.0-50.6)    | 7.84         |
|                                       | After delivery      | 60.8 (54.3-64.7)    | 52.6 (48.6-59.0)    | <u>35.29</u> |
| Cystatin C (mg/L)                     | Pre-pregnancy       | 0.9 (0.8-1.0)       | 0.7 (0.7-0.9)       | <u>45.10</u> |
|                                       | ≤ 13 weeks+6        | 0.8 (0.7-1.1)       | 0.7 (0.7-0.9)       | <u>33.33</u> |
|                                       | 14 weeks-27 weeks+6 | 0.9 (0.9-1.1)       | 0.8 (0.6-1.1)       | <u>35.29</u> |
|                                       | ≥ 28 weeks          | 1.0 (0.8-1.1)       | 0.9 (0.7-1.0)       | <u>45.10</u> |
|                                       | Before delivery     | 1.3 (1.1-1.6)       | 1.2 (1.1-1.6)       | 9.80         |
|                                       | After delivery      | 0.9 (0.9-1.1)       | 0.9 (0.8-1.0)       | <u>37.25</u> |
| Urea (mmol/L)                         | Pre-pregnancy       | 4.1 (3.8-4.9)       | 4.1 (3.1-4.7)       | <u>45.10</u> |
|                                       | ≤ 13 weeks+6        | 3.0 (2.4-3.9)       | 3.2 (2.4-4.0)       | <u>33.33</u> |
|                                       | 14 weeks-27 weeks+6 | 3.2 (2.5-3.8)       | 2.6 (2.2-3.2)       | <u>35.29</u> |
|                                       | ≥ 28 weeks          | 3.1 (2.6-3.2)       | 2.6 (2.2-3.5)       | <u>45.10</u> |
|                                       | Before delivery     | 3.8 (2.6-5.0)       | 3.7 (2.7-4.2)       | 7.84         |
|                                       | After delivery      | 5.2 (3.8-6.4)       | 4.7 (3.6-5.9)       | <u>35.29</u> |
| Uric acid (μmol/L)                    | Pre-pregnancy       | 310.3 (308.8-334.6) | 284.9 (236.5-331.5) | <u>45.10</u> |
|                                       | ≤ 13 weeks+6        | 284.3 (244.2-335.4) | 224.5 (200.0-277.5) | <u>33.33</u> |
|                                       | 14 weeks-27 weeks+6 | 286.9 (241.6-340.2) | 230.9 (201.6-268.6) | <u>35.29</u> |
|                                       | ≥ 28 weeks          | 268.1 (244.0-321.2) | 269.6 (230.1-307.4) | <u>45.10</u> |
|                                       | Before delivery     | 333.7 (277.5-399.4) | 324.1 (295.3-356.2) | 9.80         |
|                                       | After delivery      | 362.6 (281.3-384.7) | 354.8 (272.2-385.1) | <u>35.29</u> |
| <b>Hepatic Domain (30 variables)</b>  |                     |                     |                     |              |
| ALT (U/L)                             | Pre-pregnancy       | 16.3 (11.0-22.9)    | 16.1 (13.0-21.5)    | <u>33.33</u> |
|                                       | ≤ 13 weeks+6        | 19.0 (14.8-35.0)    | 16.0 (10.9-22.7)    | 15.69        |

|                                          |                     |                         |                     |                     |              |
|------------------------------------------|---------------------|-------------------------|---------------------|---------------------|--------------|
|                                          | 14 weeks-27 weeks+6 |                         | 19.6 (15.6-32.0)    | 12.7 (9.9-20.1)     | 21.57        |
|                                          | ≥ 28 weeks          |                         | 19.1 (15.5-27.0)    | 17.6 (12.9-22.0)    | <u>37.25</u> |
|                                          | Before delivery     |                         | 15.5 (10.1-22.0)    | 12.4 (10.0-15.5)    | 7.84         |
|                                          | After delivery      |                         | 23.1 (15.9-31.0)    | 16.0 (11.5-29.0)    | 23.53        |
| AST (U/L)                                | Pre-pregnancy       |                         | 20.4 (17.8-22.1)    | 17.3 (15.9-20.5)    | <u>33.33</u> |
|                                          | ≤ 13 weeks+6        |                         | 20.5 (16.2-25.2)    | 18.4 (15.3-23.7)    | 15.69        |
|                                          | 14 weeks-27 weeks+6 |                         | 22.5 (17.7-24.1)    | 18.1 (15.0-22.0)    | 21.57        |
|                                          | ≥ 28 weeks          |                         | 20.8 (18.6-22.7)    | 20.0 (16.8-22.6)    | <u>37.25</u> |
|                                          | Before delivery     |                         | 19.7 (17.0-24.1)    | 21.0 (16.2-23.2)    | 7.84         |
|                                          | After delivery      |                         | 19.9 (16.6-25.9)    | 18.0 (15.5-21.1)    | 23.53        |
| ALP (U/L)                                | Pre-pregnancy       |                         | 45.2(37.4-60.0)     | 43.0 (35.0-54.4)    | <u>33.33</u> |
|                                          | ≤ 13 weeks+6        |                         | 45.6 (39.5-62.0)    | 47.6 (40.7-61.0)    | 15.69        |
|                                          | 14 weeks-27 weeks+6 |                         | 46.1 (42.2-68.2)    | 47.0 (37.0-90.5)    | 21.57        |
|                                          | ≥ 28 weeks          |                         | 62.3 (39.8-78.5)    | 56.9 (43.9-66.9)    | <u>39.22</u> |
|                                          | Before delivery     |                         | 129.1 (99.0-171.3)  | 138.0 (111.7-194.5) | 7.84         |
|                                          | After delivery      |                         | 67.0 (58.9-73.6)    | 76.0 (58.9-82.0)    | 23.53        |
| GGT (U/L)                                | Pre-pregnancy       |                         | 16.7 (9.6-28.3)     | 13.0 (9.0-15.6)     | <u>33.33</u> |
|                                          | ≤ 13 weeks+6        |                         | 19.1 (12.5-30.6)    | 16.0 (7.5-24.2)     | 15.69        |
|                                          | 14 weeks-27 weeks+6 |                         | 25.0 (12.0-32.9)    | 10.4 (7.5-19.7)     | 21.57        |
|                                          | ≥ 28 weeks          |                         | 22.3 (6.5-27.0)     | 15.3 (9.8-19.1)     | <u>37.25</u> |
|                                          | Before delivery     |                         | 16.5 (11.6-25.7)    | 11.0 (6.1-16.8)     | 7.84         |
|                                          | After delivery      |                         | 17.1 (14.5-40.1)    | 12.0 (8.6-16.0)     | 23.53        |
| LDH (U/L)                                | Pre-pregnancy       |                         | 192.4 (180.6-213.0) | 182.0 (176.0-226.9) | <u>33.33</u> |
|                                          | ≤ 13 weeks+6        |                         | 195.8 (177.0-204.5) | 189.0 (170.0-199.7) | 15.69        |
|                                          | 14 weeks-27 weeks+6 |                         | 194.9 (183.7-225.0) | 188.6 (171.0-215.5) | 21.57        |
|                                          | ≥ 28 weeks          |                         | 204.1 (174.7-213.8) | 184.0 (160.4-198.0) | <u>39.22</u> |
|                                          | Before delivery     |                         | 215.3 (195.8-260.4) | 211.0 (191.4-232.5) | 9.80         |
|                                          | After delivery      |                         | 206.1 (187.8-220.0) | 185.0 (177.2-224.0) | 25.49        |
| <b>Immunologic Domain (75 variables)</b> |                     |                         |                     |                     |              |
| ANA titer, n (%)                         | Before delivery     | 1:100                   | 0 (0)               | 5 (17.2)            | 25.49        |
|                                          |                     | 1:320                   | 4 (18.2)            | 15 (51.7)           |              |
|                                          |                     | 1:1000                  | 13 (59.1)           | 9 (31.0)            |              |
|                                          |                     | 1:3200                  | 5 (22.7)            | 0 (0)               |              |
| Fluorescent pattern of ANA, n (%)        | Before delivery     | Speckled                | 13 (59.1)           | 15 (51.7)           | 25.49        |
|                                          |                     | Homogeneous             | 4 (18.2)            | 1 (3.4)             |              |
|                                          |                     | Cytoplasmic             | 0 (0)               | 0 (0)               |              |
|                                          |                     | Homogeneous+Cytoplasmic | 0 (0)               | 2 (6.9)             |              |
|                                          |                     | Speckled+Cytoplasmic    | 4 (18.2)            | 5 (17.2)            |              |
|                                          |                     | Speckled+Homogeneous    | 1 (4.5)             | 5 (17.2)            |              |
|                                          |                     | Nucleolar               | 0 (0)               | 1 (3.4)             |              |
| Complement C3 (g/L)                      | Pre-pregnancy       |                         | 0.9 (0.9-1.0)       | 0.9 (0.8-1.0)       | 29.41        |

|                     |                     |                    |                   |              |
|---------------------|---------------------|--------------------|-------------------|--------------|
|                     | ≤ 13 weeks+6        | 0.9 (0.9-1.0)      | 1.0 (0.9-1.1)     | 27.45        |
|                     | 14 weeks-27 weeks+6 | 1.0 (0.9-1.1)      | 1.0 (0.9-1.1)     | 23.53        |
|                     | 28 weeks-36 weeks+6 | 1.0 (0.9-1.1)      | 1.1 (1.0-1.3)     | 23.53        |
|                     | ≥ 37 weeks          | 1.0 (0.9-1.1)      | 1.0 (1.0-1.1)     | <u>43.14</u> |
|                     | Before delivery     | 0.9 (0.7-1.0)      | 1.0 (1.0-1.1)     | 7.84         |
|                     | After delivery      | 1.0 (0.8-1.1)      | 1.1 (0.9-1.1)     | 17.65        |
| Complement C4 (g/L) | Pre-pregnancy       | 0.2 (0.1-0.2)      | 0.2 (0.1-0.2)     | 29.41        |
|                     | ≤ 13 weeks+6        | 0.2 (0.2-0.2)      | 0.2 (0.1-0.2)     | 27.45        |
|                     | 14 weeks-27 weeks+6 | 0.2 (0.2-0.3)      | 0.2 (0.1-0.2)     | 23.53        |
|                     | 28 weeks-36 weeks+6 | 0.2 (0.1-0.2)      | 0.2 (0.1-0.2)     | 23.53        |
|                     | ≥ 37 weeks          | 0.2 (0.1-0.2)      | 0.2 (0.1-0.2)     | <u>43.14</u> |
|                     | Before delivery     | 0.2 (0.1-0.2)      | 0.2 (0.1-0.2)     | 7.84         |
|                     | After delivery      | 0.2 (0.2-0.3)      | 0.2 (0.2-0.2)     | 17.65        |
| CRP (mg/L)          | ≤ 13 weeks+6        | 3.1 (3.0-3.2)      | 3.3 (3.1-3.6)     | <u>49.02</u> |
|                     | 14 weeks-27 weeks+6 | 3.1 (3.0-3.5)      | 3.5 (3.1-4.9)     | <u>52.94</u> |
|                     | Before delivery     | 5.2 (3.0-12.4)     | 4.3 (3.3-31.9)    | 27.45        |
|                     | After delivery      | 3.2 (3.1-13.5)     | 3.1 (3.0-4.3)     | <u>52.94</u> |
| ESR (mm/h)          | Pre-pregnancy       | 7.0 (4.8-26.0)     | 9.0 (5.0-16.5)    | <u>35.29</u> |
|                     | ≤ 13 weeks+6        | 18.0 (13.5-22.0)   | 10.0 (6.0-17.0)   | <u>41.18</u> |
|                     | 14 weeks-27 weeks+6 | 21.0 (9.0-23.3)    | 15.0 (8.0-19.5)   | <u>41.51</u> |
|                     | Before delivery     | 16.0 (8.0-28.8)    | 9.0 (4.0-22.5)    | <u>33.33</u> |
|                     | After delivery      | 8.0 (6.0-17.0)     | 17.0 (5.0-22.0)   | <u>35.29</u> |
| PCT (ng/mL)         | Before delivery     | 0.04 (0.04-0.06)   | 0.04 (0.04-0.05)  | <u>62.75</u> |
| Ig A (g/L)          | Pre-pregnancy       | 2.8 (2.2-3.2)      | 2.7 (2.2-4.2)     | <u>52.94</u> |
|                     | ≤ 13 weeks+6        | 2.1 (1.4-3.0)      | 2.9 (2.1-3.6)     | <u>52.94</u> |
|                     | 14 weeks-27 weeks+6 | 2.2 (2.0-2.7)      | 2.0 (1.6-2.5)     | <u>50.98</u> |
|                     | ≥ 28 weeks          | 2.3 (1.8-3.1)      | 2.1 (1.4-2.4)     | <u>37.25</u> |
|                     | Before delivery     | 1.8 (1.3-2.6)      | 2.2 (1.6-2.7)     | 17.65        |
|                     | After delivery      | 2.7 (2.2-3.0)      | 2.7 (2.0-3.5)     | <u>47.06</u> |
| Ig E (IU/mL)        | Pre-pregnancy       | 37.5 (4.7-120.0)   | 76.1 (20.1-219.0) | <u>52.94</u> |
|                     | ≤ 13 weeks+6        | 60.3 (4.7-133.0)   | 59.7 (18.7-208.0) | <u>52.94</u> |
|                     | 14 weeks-27 weeks+6 | 75.5 (4.7-117.3)   | 46.4 (15.3-197.5) | <u>50.98</u> |
|                     | ≥ 28 weeks          | 93.2 (12.0-289.0)  | 38.8 (15.4-211.0) | <u>35.29</u> |
|                     | Before delivery     | 64.6 (10.1-130.8)  | 37.9 (15.9-145.0) | 17.65        |
|                     | After delivery      | 121.0 (10.3-214.8) | 35.2 (17.3-118.1) | <u>47.06</u> |
| Ig G (g/L)          | Pre-pregnancy       | 14.9 (13.8-16.4)   | 16.3 (12.2-17.5)  | <u>52.94</u> |
|                     | ≤ 13 weeks+6        | 12.1 (10.3-14.0)   | 13.4 (12.7-14.9)  | <u>52.94</u> |
|                     | 14 weeks-27 weeks+6 | 12.3 (11.5-14.7)   | 12.7 (10.0-13.5)  | <u>50.98</u> |
|                     | ≥ 28 weeks          | 12.4 (12.0-16.2)   | 11.5 (9.7-13.8)   | <u>35.29</u> |
|                     | Before delivery     | 11.4 (9.0-14.5)    | 9.3 (8.6-11.5)    | 17.65        |
|                     | After delivery      | 15.2 (13.2-16.5)   | 14.5 (12.3-16.9)  | <u>47.06</u> |

|                                             |                     |          |                   |                    |              |
|---------------------------------------------|---------------------|----------|-------------------|--------------------|--------------|
| Ig M (g/L)                                  | Pre-pregnancy       |          | 0.9 (0.8-1.3)     | 1.1 (0.6-1.4)      | <u>52.94</u> |
|                                             | ≤ 13 weeks+6        |          | 0.7 (0.5-1.1)     | 1.1 (0.6-1.6)      | <u>52.94</u> |
|                                             | 14 weeks-27 weeks+6 |          | 0.7 (0.5-1.0)     | 1.0 (0.5-1.1)      | <u>50.98</u> |
|                                             | ≥ 28 weeks          |          | 0.9 (0.7-1.0)     | 0.9 (0.5-1.3)      | <u>35.29</u> |
|                                             | Before delivery     |          | 0.7 (0.4-0.9)     | 0.8 (0.5-1.0)      | 17.65        |
|                                             | After delivery      |          | 0.8 (0.7-0.9)     | 0.9 (0.7-1.3)      | <u>47.06</u> |
| IgA anti-B2GP1 antibodies (RU/mL)           | ≤ 13 weeks+6        |          | 1.6 (1.0-6.2)     | 9.2 (2.8-13.9)     | <u>56.86</u> |
|                                             | Before delivery     |          | 0.0 (0.0-4.7)     | 0.5 (0.0-5.2)      | <u>52.94</u> |
| IgG anti-B2GP1 antibodies (RU/mL)           | ≤ 13 weeks+6        |          | 2.4 (1.1-3.7)     | 2.7 (1.1-8.8)      | <u>60.78</u> |
|                                             | Before delivery     |          | 1.6 (0.4-2.6)     | 1.0 (0.7-4.0)      | <u>54.90</u> |
| IgM anti-B2GP1 antibodies (RU/mL)           | ≤ 13 weeks+6        |          | 2.5 (0.4-9.2)     | 1.9 (0.4-3.5)      | <u>60.78</u> |
|                                             | Before delivery     |          | 2.9 (0.1-19.3)    | 0.8 (0.0-4.0)      | <u>54.90</u> |
| IgA ACA (RU/mL)                             | ≤ 13 weeks+6        |          | 1.7 (1.4-2.7)     | 1.1 (0.0-3.7)      | <u>52.94</u> |
|                                             | Before delivery     |          | 1.3 (0.0-1.8)     | 1.4 (0.8-3.5)      | <u>52.94</u> |
| IgG ACA (RU/mL)                             | ≤ 13 weeks+6        |          | 1.3 (0.0-7.6)     | 0.0 (0.0-2.6)      | <u>39.22</u> |
|                                             | Before delivery     |          | 1.0 (0.0-4.8)     | 0.0 (0.0-2.6)      | <u>33.33</u> |
| IgM ACA (RU/mL)                             | ≤ 13 weeks+6        |          | 2.4 (0.5-3.0)     | 0.4 (0.0-1.4)      | <u>39.22</u> |
|                                             | Before delivery     |          | 0.2 (0.0-1.8)     | 0.0 (0.0-0.7)      | <u>33.33</u> |
| Anti-ds-DNA antibodies (IU/mL)              | Pre-pregnancy       |          | 42.8 (7.2-78.5)   | 81.5 (34.3-194.5)  | <u>31.37</u> |
|                                             | ≤13 weeks+6         |          | 54.2 (20.2-208.3) | 122.5 (20.8-145.0) | <u>33.33</u> |
|                                             | 14 weeks-27 weeks+6 |          | 39.2 (12.8-217.1) | 67.5 (26.9-153.0)  | <u>43.14</u> |
|                                             | ≥ 28 weeks          |          | 36.0 (6.7-255.7)  | 69.0 (21.0-175.2)  | <u>50.98</u> |
|                                             | Before delivery     |          | 57.3 (15.7-186.9) | 46.6 (19.8-100.0)  | 5.88         |
|                                             | After delivery      |          | 31.7 (3.8-136.2)  | 80.1 (23.5-156.7)  | <u>39.22</u> |
| Anti-C1q antibodies (RU/mL)                 | Before delivery     |          | 2.2 (1.3-9.7)     | 1.1 (0.0-5.8)      | <u>49.02</u> |
| Anti-nucleosome antibodies (RU/mL)          | Before delivery     |          | 0.4 (0.0-6.0)     | 0.8 (0.0-5.0)      | 29.41        |
| Anti-ribosomal P protein antibodies (RU/mL) | Before delivery     |          | 1.8 (1.1-7.7)     | 1.4 (0.4-50.3)     | <u>47.06</u> |
| Anti-histone antibodies, n (%)              | Before delivery     | negative | 21 (95.5)         | 26 (89.7)          | <u>31.37</u> |
|                                             |                     | (+-)     | 1(4.5)            | 0 (0)              |              |
|                                             |                     | (+)      | 0 (0)             | 3 (10.3)           |              |
| Anti-nRNP/Sm antibodies, n (%)              | Before delivery     | negative | 15 (68.2)         | 24 (82.8)          | <u>31.37</u> |
|                                             |                     | (+)      | 1 (4.5)           | 4 (13.8)           |              |
|                                             |                     | (++)     | 0 (0)             | 1 (3.4)            |              |
|                                             |                     | (+++)    | 6 (27.3)          | 0 (0)              |              |
| Anti-Ro52 antibodies, n (%)                 | Before delivery     | negative | 10 (45.5)         | 17 (58.6)          | <u>31.37</u> |
|                                             |                     | (+-)     | 0 (0)             | 2 (6.9)            |              |
|                                             |                     | (+)      | 3 (13.6)          | 3 (10.3)           |              |



|                                     |                 |          |                  |                  |              |
|-------------------------------------|-----------------|----------|------------------|------------------|--------------|
|                                     |                 | (++)     | 2 (9.1)          | 2 (6.9)          |              |
|                                     |                 | (+++)    | 7 (31.8)         | 5 (17.2)         |              |
| Anti-SSA antibodies, n (%)          | Before delivery | negative | 3 (13.6)         | 17 (58.6)        | <u>31.37</u> |
|                                     |                 | (+-)     | 4 (18.2)         | 0 (0)            |              |
|                                     |                 | (+)      | 1 (4.5)          | 4 (13.8)         |              |
|                                     |                 | (++)     | 2 (9.1)          | 0 (0)            |              |
|                                     |                 | (+++)    | 12 (54.5)        | 8 (27.6)         |              |
| <b>Thyroid Domain (4 variables)</b> |                 |          |                  |                  |              |
| free T4 (fT4) (pmol/L)              | ≤ 13 weeks+6    |          | 12.9 (12.4-15.0) | 16.1 (12.7-19.1) | <u>58.82</u> |
|                                     | Before delivery |          | 12.9 (11.9-13.2) | 11.9 (10.6-13.0) | 29.41        |
| TSH (mIU/L)                         | ≤ 13 weeks+6    |          | 1.3 (1.0-2.4)    | 1.2 (0.2-2.4)    | <u>54.90</u> |
|                                     | Before delivery |          | 1.6 (1.3-2.6)    | 3.0 (1.7-3.2)    | <u>31.37</u> |

Data are presented as median value (interquartile range) or number of patients (percentage). In the column named “missing data rate”, the underlined values indicates that the missing rate of each variables is more than 30%.

**ALT:** Alanine Aminotransferase; **AST:** Aspartate Aminotransferase; **ALP:** Alkaline Phosphate; **GGT:** Gamma-Glutamyltransferase; **LDH:** Lactate Dehydrogenase; **CRP:** C-reactive protein; **ESR:** Erythrocyte Sedimentation Rate; **PCT:** Procalcitonin; **Ig:** Immunoglobulin; **ACA:** anti-cardiolipin antibodies; **ANA:** Anti-nuclear antibody; **PT:** Prothrombin Time; **PT-act:** Prothrombin Time Activity; **PT-R:** Prothrombin Time Ratio; **INR:** international normalized ratio; **Fbg:** Fibrinogen; **APTT:** activated partial thromboplastin time; **TT:** thrombin time; **TSH:** thyroid-stimulating hormone;
